# Supplementary material
Source: publisher figshare collection journal article supplement (https://frontiersin.figshare.com/ndownloader/files/22186800)
Supplement: Supplementary file [file 22186800]

Y537S - p.Tyr537Ser – c.1610A>C

ESR1(c.1610A>C;p.Y537S) X

Syntax: ESR1(c.1610A>C;p.Y537S)  
Type: Substitution\_Missense  
Chromosome: 6  
Start: 152098787  
End: 152098788  
Strand: 1  
ID: [COSM1074639](#)

OK

Y537N - p.Tyr537Asn - c.1609T>A

ESR1(c.1609T>A;p.Y537N) X

Syntax: ESR1(c.1609T>A;p.Y537N)  
Type: Substitution\_Missense  
Chromosome: 6  
Start: 152098786  
End: 152098787  
Strand: 1  
ID: [COSM1074635](#)

OK

Y537C - p.Tyr537Cys - c.1610A>G (C)

ESR1(c.1610A>G;p.Y537C) X

Syntax: ESR1(c.1610A>G;p.Y537C)  
Type: Substitution\_Missense  
Chromosome: 6  
Start: 152098787  
End: 152098788  
Strand: 1  
ID: [COSM1074637](#)

OK

D538G - p.Asp538Gly – c.1613A>G

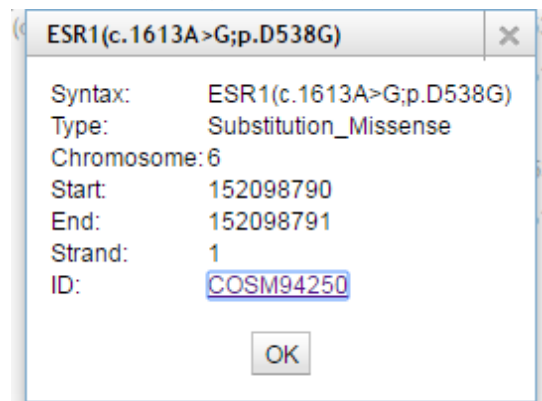

E380Q – p.Glu380Gln – c.1138G>C

```
>ESR1_ENST00000544394
GACCAGATGGTCAGTGCCTTGTTGGATGCTGAGCCCCGATACTCTATTCCGAGTATGATCCTACCAGACCCTTCAGT
GAAGCTTCGATGATGGGCTTACTGACCAACCTGGCAGACAGGGAGCTGGTTCACATGATCAACTGGGCGAAGAGGGTG
CCAGGCTTTGTGGATTTGACCCTCCATGATCAGGTCCACCTTCTA [G/C] AATGTGCCTGGCTAGAGATCCTGATGAT
TGGTCTCGTCTGGCGCTCCATGGAGCACCCAGGGAAGCTACTGTTTGCTCCTAACTTGCTCTTGGACAGGAACCAGGG
AAAATGTGTAGAGGGCATGGTGGAGATCTTCGACATGCTGCTGGCTACATCATCTCGGTTCCGCATGATGAATCTGCA
GGGAGAGGAGTTTGTGT
```
